# Supplementary material for: Simple synthesis of green luminescent N-doped carbon dots for malachite green determination
Source: Royal Society of Chemistry journal article supplement (doi:10.1039/d2ay00682k), 2022-01-01
Supplement: d2ay00682k1.pdf [file d2ay00682k1.pdf]

## Electronic Supplementary Information

### Simple synthesis of green luminescent N-doped carbon dots for malachite green determination

Sijie Cheng <sup>a,1</sup> · Xin Wang <sup>a,1</sup> · Xuerong Yan <sup>a</sup> · Yanteng Xiao <sup>a</sup> · Yong Zhang <sup>a,\*</sup>

<sup>a</sup> School of Chemistry and Chemical Engineering, Shanxi University, Taiyuan 030006, Shanxi,  
China

#### Chemicals/reagents

Fuchsin basic was obtained from Sinopharm Chemical Reagent Co., Ltd.. Ethylenediamine tetraacetic acid disodium salt (EDTA-2Na) was purchased from Beijing Chemical Works. N, N-dimethylformamide (DMF) was purchased from Tianxin Fine Chemical Development Center. Malachite green (MG) was purchased from Shanghai Specimen Model Factory. Arabidopsis thaliana were provided by the Institute of Biomedical Sciences in Shanxi University. Britton-Robinson (BR) buffer solutions were prepared from NaOH, H<sub>3</sub>BO<sub>3</sub> and H<sub>3</sub>PO<sub>4</sub>.

#### Quantum yield (QY)

The quantum yield (QY) of N-CDs was calculated using fluorescein (QY = 95 % in 0.1 M NaOH) as a reference. In a typical experiment, the fluorescence spectra and UV-vis absorption spectra of N-CDs and fluorescein were obtained separately, and the integral area (F) of the fluorescence spectrum was calculated. QY can be obtained by the following formula:

$$QY_u = QY_s * (F_u / F_s) * (A_s / A_u) * (\eta_u / \eta_s)^2$$

where u/s represent N-CDs/fluorescein. A represent for absorbance, and  $\eta$  stand for refractive indexes.

#### Fig. S1

---

\* Corresponding author.

E-mail address: zhangyong@sxu.edu.cn (Y. Zhang).

<sup>1</sup> These two authors contributed equally to this work.

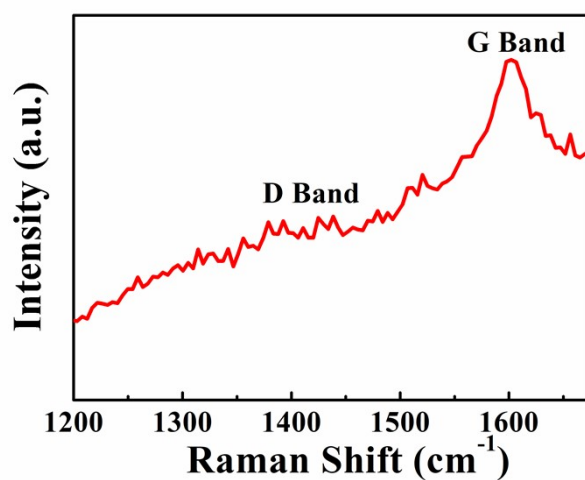

Fig. S1 Raman spectra of N-CDs.

Fig. S2

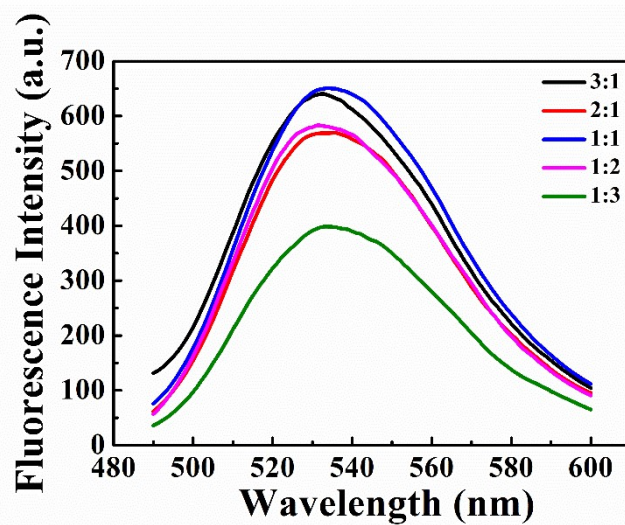

Fig. S2 Fluorescence spectra of N-CDs when the molar mass ratio of the precursors were different ( $n_{(\text{fuchsin basic})} : n_{(\text{EDTA-2Na})} = 3:1; 2:1, 1:1, 1:2, 1:3$ ).

Table S1 The instruments used in the experiment.

| Instruments                                      | Manufacturer             | Model             |
|--------------------------------------------------|--------------------------|-------------------|
| Ultraviolet-visible spectrometer                 | Purkay, China            | TU-1901           |
| Fluorescence spectrophotometer                   | Shimadzu, Japan          | RF-5301           |
| Transmission electron microscope                 | JEOL, Japan              | JEM-2100          |
| Infrared spectrometer                            | Bruker, Germany          | VERTEX 70         |
| Steady-state transient fluorescence spectrometer | PTI, USA                 | FLS920            |
| X-ray photoelectron spectrometer                 | Thermo Fisher Scientific | Escalab 250Xi     |
| X-ray diffractometer                             | Bruker, Germany          | Bruker D8         |
| Confocal laser scanning microscope               | Zeiss, Germany           | LSM880 + Airyscan |

**Table S2** Comparison of MG detection by different methods.

| Method                                 | Linear range ( $\mu\text{M}$ ) | LOD (nM)             | Time (min) | Sample     | Ref.      |
|----------------------------------------|--------------------------------|----------------------|------------|------------|-----------|
| Ag NWS@PDMS                            | 0.5-100                        | 10                   | /          | Fruits     | 4         |
| Eu(MAA) <sub>3</sub> Phen              | 0.5-20                         | 117.29               | 5          | Water      | 2         |
| HDPB/ABPE                              | 0.2-40                         | 4.0                  | 2.5        | Water/fish | 6         |
| MIP@PS@CdTe                            | 0.01-20                        | 4.7                  | 4          | Water/fish | 32        |
| NCQDs                                  | 10-80                          | $5.16 \times 10^3$   | 1          | Water      | 11        |
| Fe <sub>3</sub> O <sub>4</sub> @Au MCS | $10^3$ -0.1                    | $10^2$               | 180        | Water      | 3         |
| AgNDS SERS                             | $10^{-2}$ - $10^{-6}$          | $9.4 \times 10^{-4}$ | 30         | Water      | 5         |
| AuNPs/GQDs-WS <sub>2</sub> /GCE        | 0.01-10                        | 3.38                 | 120        | Fish       | 33        |
| N-CDs                                  | 0.99-311.57                    | 27.28                | 1          | Water      | This work |

**Table S3** Detection of MG in real water samples. (n = 5)

| Sample       | Initial concentration | Added ( $\mu\text{M}$ ) | Detected ( $\mu\text{M}$ ) | Recoveries (%) | RSD (%) |
|--------------|-----------------------|-------------------------|----------------------------|----------------|---------|
| Jinyang Lake | Not detected          | 2.00                    | $2.06 \pm 0.10$            | 103.00         | 2.35    |
|              |                       | 5.00                    | $5.11 \pm 0.06$            | 102.20         | 2.08    |
|              |                       | 8.00                    | $7.96 \pm 0.04$            | 99.50          | 0.66    |
|              |                       | 10.00                   | $9.89 \pm 0.13$            | 98.90          | 1.82    |
